# Supplementary material
Source: PubMed Central journal article supplement (PMC3654681)
Supplement: NIHMS142016-supplement-Supp1.pdf [file NIHMS142016-supplement-Supp1.pdf]

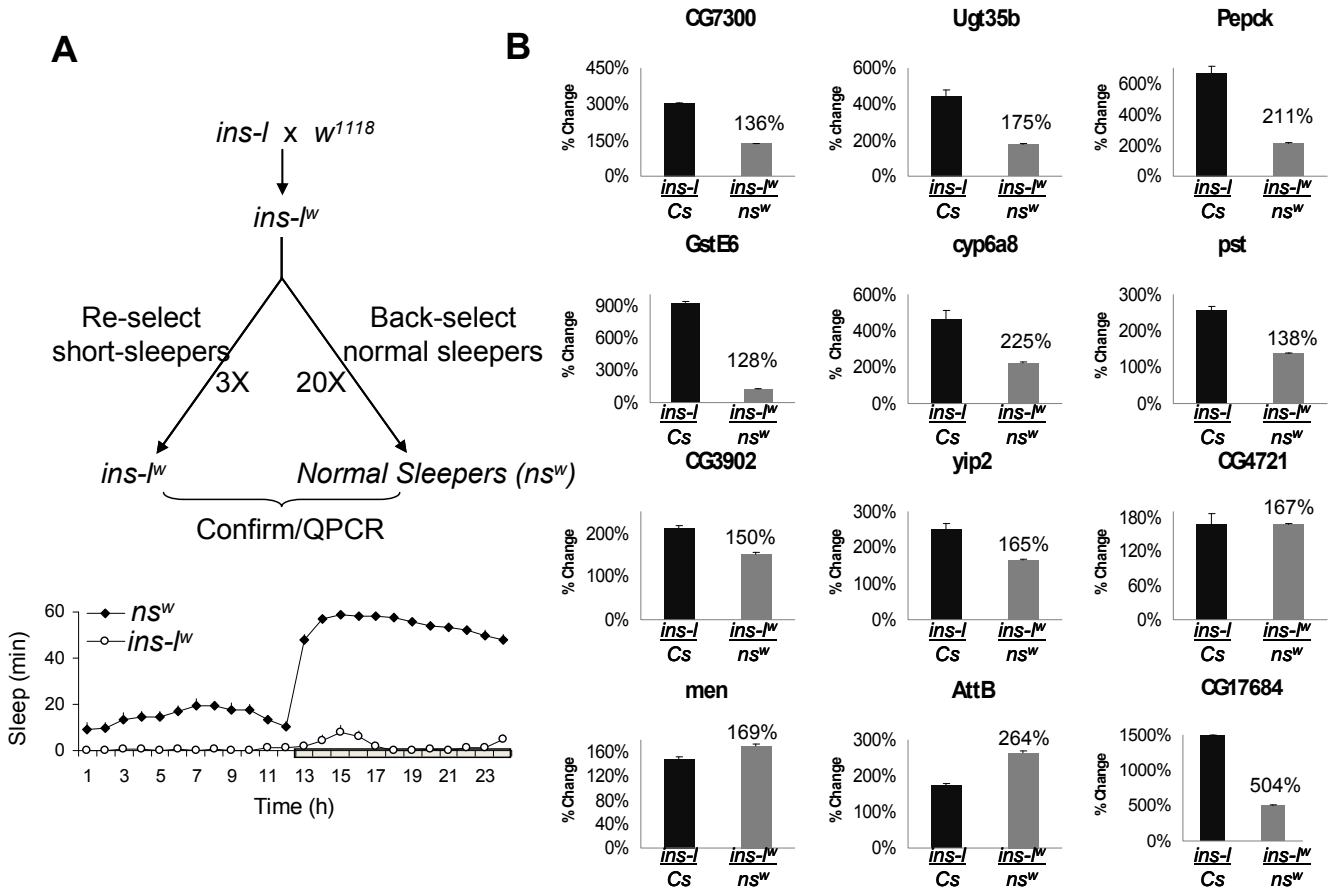

**Supplementary Figure 1. Evaluation of gene expression from *ins-l* flies placed into a separate genetic background.**

**A)** Schematic of re-selection and back-selection procedures. *ins-l* flies were out-crossed to  $w^{1118}$ . After each cross, white-eyed progeny that displayed short-sleep, short sleep bouts and hyperactivity were identified and then crossed again to normal-sleeping  $w^{1118}$  flies. This was repeated 5 times creating a new stock, *ins-l<sup>w</sup>*. *ins-l<sup>w</sup>* flies were then re-selected to obtain insomnia-like flies (left) and back-selected 20 generations to obtain normal sleeping flies (*ns<sup>w</sup>*, right). Sleep graph: daily sleep in min/h for 24h for *ins-l<sup>w</sup>* (daily sleep:  $34 \pm 6$ min, average nighttime sleep bout duration:  $14 \pm 6$ min,  $n=20$ ) and *ns<sup>w</sup>* flies (daily sleep:  $825 \pm 25$ min, average nighttime sleep bout duration  $73 \pm 8$ min,  $n=32$ ). **B)** QPCR confirmation of gene expression changes in *ins-l* flies expressed as % change from Cs flies (*ins-l*/Cs) and *ins-l<sup>w</sup>* as a percentage of *ns<sup>w</sup>* controls (*ins-l<sup>w</sup>*/*ns<sup>w</sup>*).
